# Supplementary material for: Social Isolation, Social Interaction, and Neuroticism: A Mendelian Randomization Study
Source: Research Square preprint supplement (doi:10.21203/rs.3.rs-4168624/v1), 2024-04-03
Supplement: Supplementary file 1 [file 626e20decb9c472853782355.docx]

**Supplementary Figure 1A**. MR plots for causal effects of the association between loneliness and neuroticism.


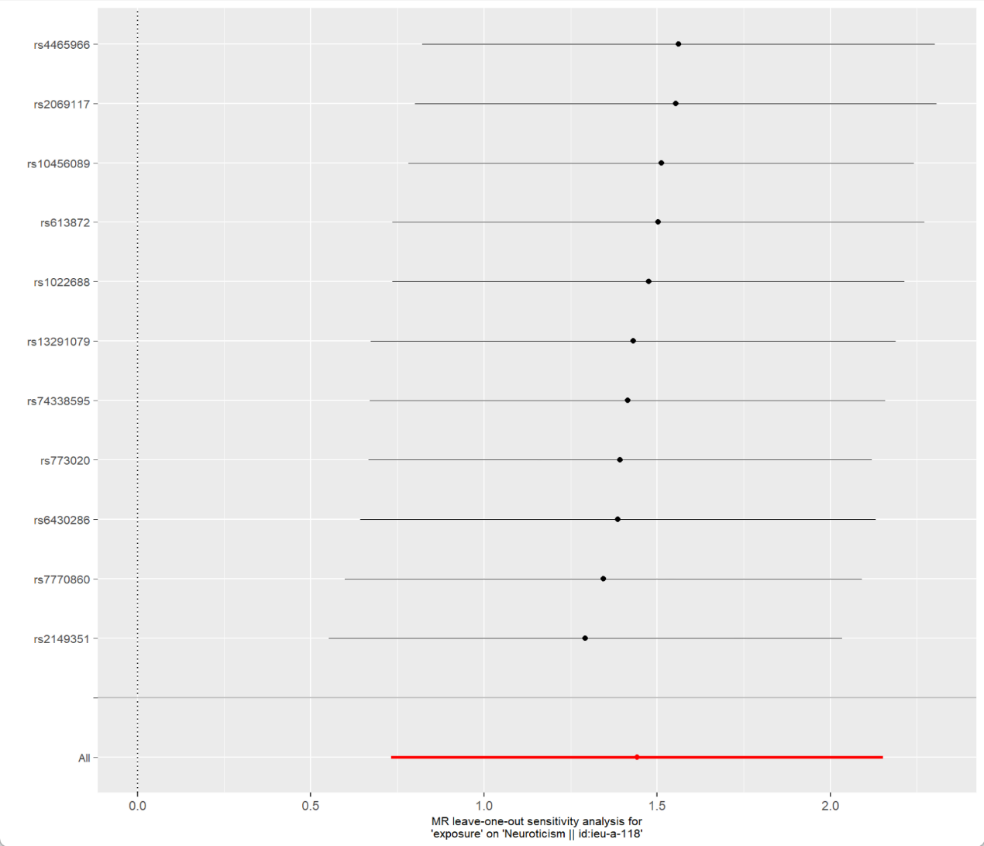

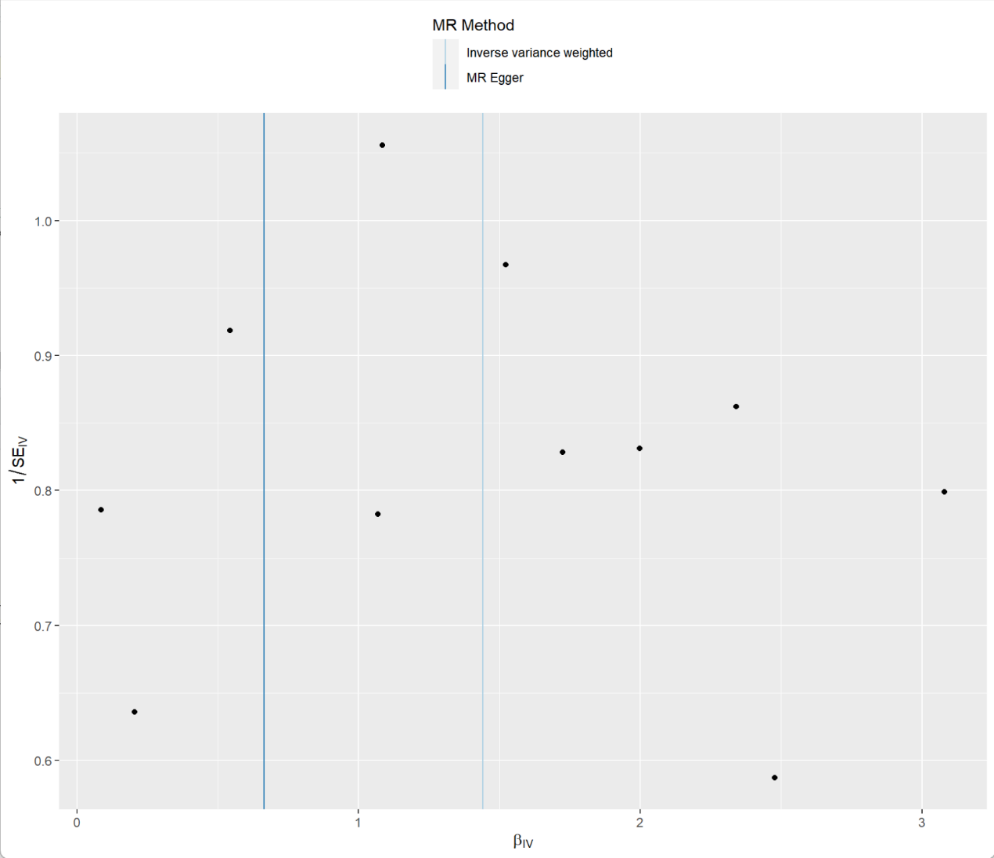


A) Leave-one-out analysis for association between loneliness and neuroticism.

B) Funnel plot of MR analysis for association between loneliness and neuroticism.

MR: Mendelian randomization.

**Supplementary Figure 1B**. MR plots for causal effects of the association between loneliness (MTAG) and neuroticism.


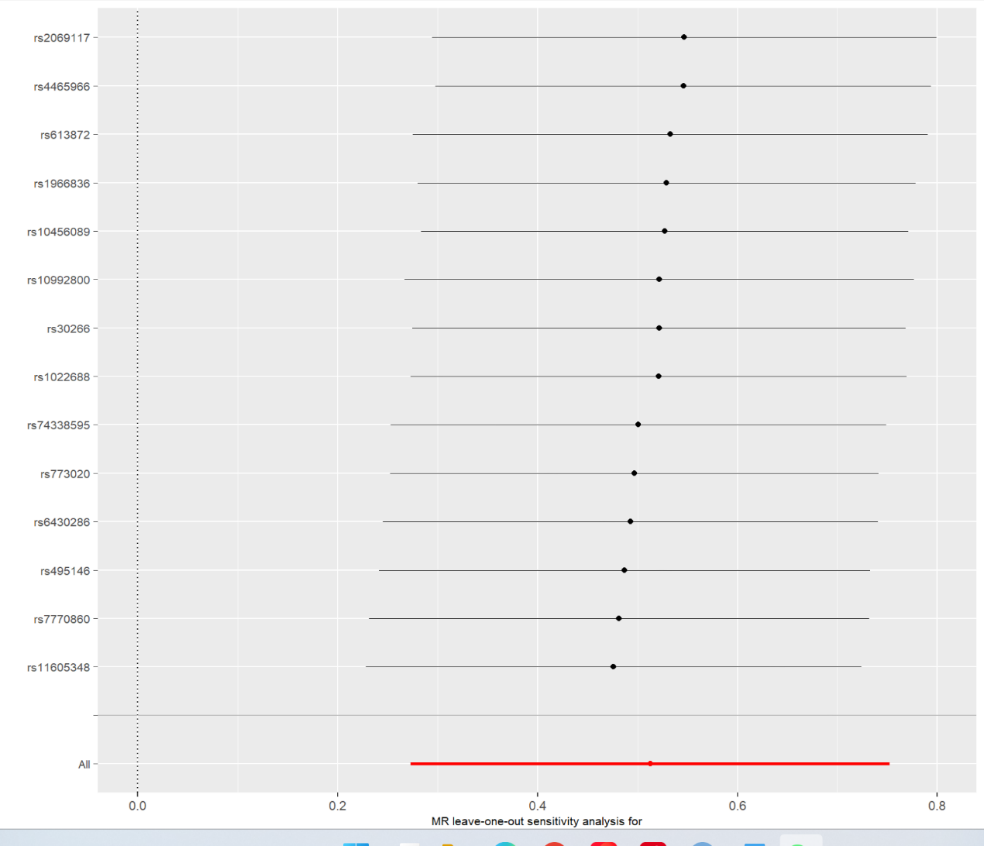

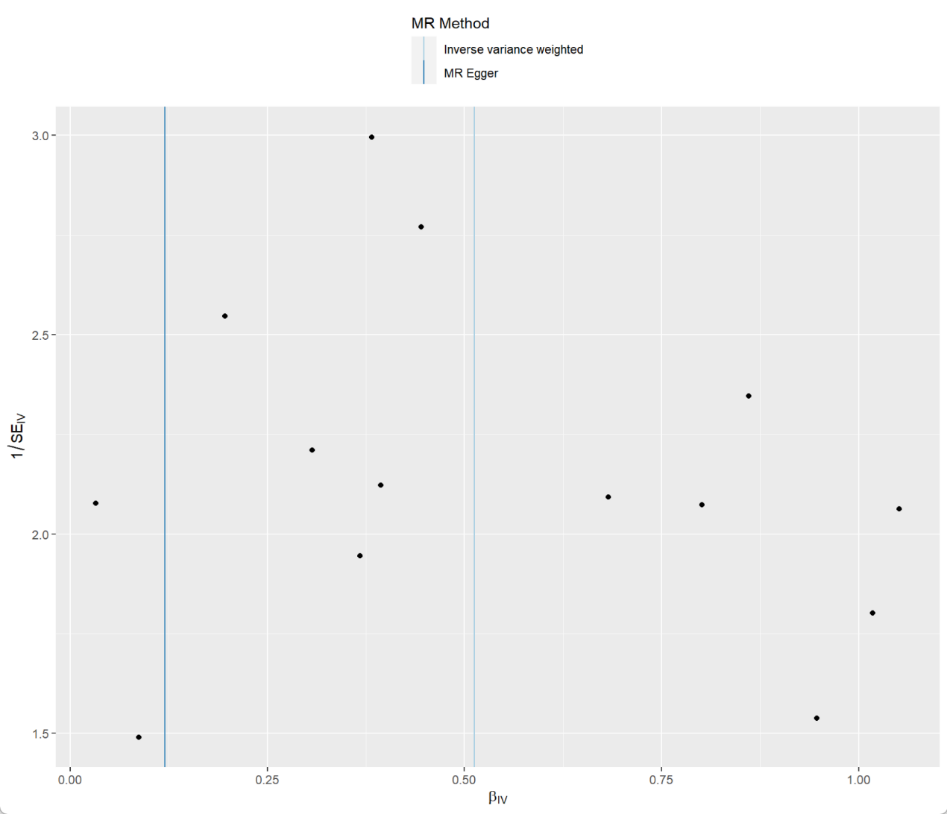


A) Leave-one-out analysis for association between loneliness (MTAG) and neuroticism.

B) Funnel plot of MR analysis for association between loneliness (MTAG) and neuroticism.

MR: Mendelian randomization.
