# Supplementary material for: Social Isolation, Social Interaction, and Neuroticism: A Mendelian Randomization Study
Source: Research Square preprint supplement (doi:10.21203/rs.3.rs-4168624/v1), 2024-04-03
Supplement: Supplementary file 2 [file 681e84708261fd3b982ba5fe.docx]

**Supplementary Table 4.** MR-Egger pleiotropy test for Mendelian randomization analysis

| Exposure | MR-Egger for directional pleiotropy | | |
| --- | --- | --- | --- |
| Intercept | Standard error | *P* |
| Regular attendance at a gym or sports club | -0.02272874 | 0.02312147 | 0.3980854 |
| Regular participation in pub/social club | 0.00380343 | 0.00635272 | 0.5641300 |
| Regular attendance at religious group | -0.04741672 | 0.01481653 | 0.0076289 |
| Loneliness | 0.004278452 | 0.01011558 | 0.6822536 |
| Loneliness (MTAG) | 0.005624907 | 0.008900283 | 0.5392464 |
