# Supplementary material for: Social Isolation, Social Interaction, and Neuroticism: A Mendelian Randomization Study
Source: Research Square preprint supplement (doi:10.21203/rs.3.rs-4168624/v1), 2024-04-03
Supplement: Supplementary file 3 [file add7af747741b5e8b17392cf.docx]

**Supplementary Table 3.** Heterogeneity test for Mendelian randomization analysis.

| **Exposure** | **Model** | **Heterogeneity** | | |
| --- | --- | --- | --- | --- |
| **Q** | **Degrees of Freedom** | ***P*** |
| Regular attendance at a gym or sports club | Inverse variance weighted | 2.908579 | 4 | 0.57324 |
|  | MR-Egger | 1.942261 | 3 | 0.58448 |
| Regular participation in pub/social club | Inverse variance weighted | 13.30886 | 10 | 0.20691 |
|  | MR-Egger | 12.7991 | 9 | 0.17191 |
| Regular attendance at religious group | Inverse variance weighted | 29.3022 | 13 | 0.00593 |
|  | MR-Egger | 15.80936 | 12 | 0.20012 |
| Loneliness | Inverse variance weighted | 5.621494 | 10 | 0.84600 |
|  | MR-Egger | 5.442601 | 9 | 0.79415 |
| Loneliness (MTAG) | Inverse variance weighted | 6.240311 | 13 | 0.93697 |
|  | MR-Egger | 5.840897 | 12 | 0.92389 |
