# Supplementary material for: Social Isolation, Social Interaction, and Neuroticism: A Mendelian Randomization Study
Source: Research Square preprint supplement (doi:10.21203/rs.3.rs-4168624/v1), 2024-04-03
Supplement: Supplementary file 4 [file b799716834ffa0b2ffdf7fc1.docx]

**Supplementary Table 2.** MR analyses effect estimates for the association between social interaction and social isolation and neuroticism (GWAS-ID: ieu-a-118)

| **Exposure** | **Number of SNPs** | **Method** | **or** | **or_lci95** | **or_uci95** | **Estimate** | ***P* value** |
| --- | --- | --- | --- | --- | --- | --- | --- |
| Regular attendance at a gym or sports club | 5 | MR Egger | 23.332 | 0.016 | 34501.195 | 23.332(0.016-34501.20) | 0.459 |
| 5 | Weighted median | 0.450 | 0.146 | 1.394 | 0.45(0.15-1.39) | 0.166 |
| 5 | Inverse variance weighted | 0.618 | 0.248 | 1.540 | 0.62(0.25-1.54) | 0.301 |
| 5 | Simple mode | 0.427 | 0.092 | 1.980 | 0.43(0.09-1.98) | 0.338 |
| 5 | Weighted mode | 0.402 | 0.080 | 2.027 | 0.40(0.08-2.03) | 0.332 |
| Regular participation in pub/social club | 11 | MR Egger | 0.844 | 0.132 | 5.389 | 0.84(0.13-5.39) | 0.861 |
| 11 | Weighted median | 1.648 | 0.737 | 3.686 | 1.65(0.74-3.69) | 0.224 |
| 11 | Inverse variance weighted | 1.431 | 0.748 | 2.736 | 1.43(0.75-2.74) | 0.279 |
| 11 | Simple mode | 2.334 | 0.581 | 9.363 | 2.33(0.58-9.36) | 0.259 |
| 11 | Weighted mode | 1.964 | 0.509 | 7.588 | 1.96(0.51-7.59) | 0.351 |
| Regular attendance at religious group | 14 | MR Egger | 1.33E+04 | 31.204 | 5.67E+06 | 13306.04(31.20-5674206) | 0.010 |
| 14 | Weighted median | 6.85E-01 | 0.253 | 1.86E+00 | 0.69(0.25-1.86) | 0.458 |
| 14 | Inverse variance weighted | 7.30E-01 | 0.274 | 1.94E+00 | 0.73(0.27-1.94) | 0.528 |
| 14 | Simple mode | 5.78E-01 | 0.098 | 3.41E+00 | 0.58(0.10-3.41) | 0.555 |
| 14 | Weighted mode | 5.91E-01 | 0.094 | 3.72E+00 | 0.59(0.09-3.72) | 0.585 |
| Loneliness | 11 | MR Egger | 1.944 | 0.049 | 76.510 | 1.94(0.05-76.51) | 7.31E-01 |
| 11 | Weighted median | 3.884 | 1.484 | 10.164 | 3.88(1.48-10.16) | 5.70E-03 |
| 11 | Inverse variance weighted | 4.230 | 2.081 | 8.599 | 4.23(2.08-8.60) | 6.76E-05 |
| 11 | Simple mode | 5.023 | 1.026 | 24.589 | 5.02(1.03-24.59) | 7.44E-02 |
| 11 | Weighted mode | 3.748 | 0.859 | 16.351 | 3.75(0.86-16.35) | 1.09E-01 |
| Loneliness (MTAG) | 14 | MR Egger | 1.127 | 0.325 | 3.904 | 1.13(0.33-3.90) | 8.53E-01 |
| 14 | Weighted median | 1.481 | 1.080 | 2.033 | 1.48(1.08-2.03) | 1.62E-02 |
| 14 | Inverse variance weighted | 1.670 | 1.314 | 2.122 | 1.67(1.31-2.12) | 2.75E-05 |
| 14 | Simple mode | 1.340 | 0.847 | 2.313 | 1.34(0.84-2.31) | 2.41E-01 |
| 14 | Weighted mode | 1.429 | 0.895 | 2.283 | 1.42(0.89-2.28) | 1.69E-01 |
