# Supplementary material for: Social Isolation, Social Interaction, and Neuroticism: A Mendelian Randomization Study
Source: Research Square preprint supplement (doi:10.21203/rs.3.rs-4168624/v1), 2024-04-03
Supplement: Supplementary file 5 [file eec7863fb7a8eeb163aeb31c.docx]

**Supplementary Table 1A-E.** SNPs selected in Mendelian randomization analyses of the association between social interaction, social isolation, and neuroticism (searched from PhenoScanner, catalogue: Diseases & traits, p: 1E-5, r2 :0.8, proxies: none).

**Supplementary Table 1A.** SNPs selected in Mendelian randomization analyses of the association between regular participation in pub/social club and neuroticism.

| **SNPs** | **Traits** | **F statistics** |
| --- | --- | --- |
| rs6666366 | Types of transport used, excluding work: public transport | 53.98 |
| rs12472555 | Past tobacco smoking\Smoking status: previous\Schizophrenia\Ever smoked\Years of educational attainment\Fluid intelligence score\Pulse rate | 37.53 |
| rs4666634 | Not found | 32.41 |
| rs10031252 | Qualifications: college or university degree\Years of educational attainment\Leg fat percentage right\Body fat percentage\Job involves mainly walking or standing\Job involves heavy manual or physical work\Trunk fat percentage\Leg fat percentage left\Years of educational attainment in females\Arm fat percentage left\Leg fat mass right\Qualifications: none\Time spent using computer | 32.77 |
| rs1229984 | Alcohol intake frequency\Esophageal squamous cell carcinoma Esophageal cancer\Esophageal squamous cell carcinoma Esophageal cancer\Esophageal cancer\Esophageal neoplasms\Alcohol dependence\Alcohol dependence\Upper aero digestive tract cancer\Upper aerodigestive tract cancers\Head and neck neoplasms\Drinking intensity in ever drinkers\Alcohol drinker status: never\Self-reported gout\Alcohol intake versus 10 years previously\Reason for reducing amount of alcohol drunk: health precaution | 33.46 |
| rs6969458 | Average weekly beer plus cider intake\Mineral and other dietary supplements: fish oil\Smoking status:  current\Current tobacco smoking\Mineral and other dietary supplements: none of the above | 106.77 |
| rs10978543 | Average weekly beer plus cider intake\Vascular or heart problems diagnosed by doctor: high blood pressure\Vascular or heart problems diagnosed by doctor: none of the above\Treatment with blood pressure medication\Self-reported hypertension | 61.14 |
| rs61873510 | Basal metabolic rate\Leg fat-free mass left\Leg predicted mass left\Whole body water mass\Whole body fat-free mass\Weight\Trunk fat-free mass\Leg fat-free mass right\Trunk predicted mass\Leg predicted mass right\Arm fat-free mass left\Arm predicted mass left\Arm predicted mass right Arm fat-free mass right\Comparative height size at age 10 | 32.96 |
| rs36030660 | Basal metabolic rate\Whole body water mass\Whole body fat-free mass\Leg fat-free mass left\Leg predicted mass left\Trunk fat-free mass\Arm fat-free mass left\Trunk predicted mass\Arm predicted mass left\Weight\Leg predicted mass right\Leg fat-free mass right\Impedance of whole body\Arm fat-free mass right\Arm predicted mass right\Impedance of leg left | 32.48 |
| rs139920 | Body mass index\Mean corpuscular volume\Morning or evening person\Current tobacco smoking\Mean corpuscular hemoglobin\Percentage of total caloric intake from macronutrients carbohydrates | 34.62 |
| rs12759477 | Morning or evening person\Average weekly beer plus cider intake\Body mass index | 40.04 |

**Supplementary Table 1B.** SNPs selected in Mendelian randomization analyses of the association between regular attendance at a gym or sports club and neuroticism.

| **SNPs** | **Traits** | **F statistics** |
| --- | --- | --- |
| rs11712056 | Qualifications: college or university degree\Years of educational attainment\Time spent watching television\Body mass index\Leg fat mass left\Leg fat mass right\High light scatter reticulocyte count\High light scatter percentage of red cells\Weight\Arm fat mass right\Arm fat mass left\Educational attainment college completion\Whole body fat mass\Qualifications: A levels or as levels or equivalent\Impedance of arm right\Leg fat percentage right\Arm predicted mass left\Reticulocyte count\Impedance of arm left\Years of educational attainment in females\Reticulocyte fraction of red cells\Arm fat-free mass left\Leg fat percentage left\Arm predicted mass right\Immature fraction of reticulocytes\Basal metabolic rate\Years of educational attainment in males\Impedance of whole body\Trunk fat mass\Arm fat-free mass right\Arm fat percentage right\Arm fat percentage left\Age at first live birth | 32.20 |
| rs13002862 | Number of incorrect matches in round\Age at menarche | 30.55 |
| rs17315037 | Not Found | 38.15 |
| rs2499760 | Self-reported osteoarthritis | 38.42 |
| rs7627971 | Drive faster than motorway speed limit\Risk taking\Impedance of arm left\Impedance of arm right\Impedance of whole body\Arm predicted mass left\Nervous feelings\Arm fat-free mass right\Arm fat-free mass left\Past tobacco smoking\Worrier or anxious feelings\Arm predicted mass right\Trunk fat-free mass\Whole body water mass | 30.11 |

**Supplementary Table 1C.** SNPs selected in Mendelian randomization analyses of the association between regular attendance at religious group and neuroticism.

| **SNPs** | **Traits** | **F statistics** |
| --- | --- | --- |
| rs332828 | Nervous feelings | 50.82 |
| rs3747630 | Qualifications: college or university degree/Years of educational attainment/College completion/College completion/Mineral and other dietary supplements: fish oil/Years of educational attainment in females/Sodium in urine | 30.58 |
| rs1991083 | Sitting height/Height/Trunk fat-free mass/Trunk predicted mass/Whole body water mass/Whole body fat-free mass/Arm fat-free mass right/Comparative height size at age 10/Arm predicted mass left/Arm fat-free mass left | 33.26 |
| rs1160543 | Qualifications: college or university degree/Years of educational attainment/Leg fat mass left/Leg fat mass right/Body mass index/Arm fat mass left/Leg fat percentage right/Leg fat percentage left/Whole body fat mass/Waist circumference | 43.72 |
| rs3197999 | Inflammatory bowel disease/Inflammatory bowel disease/Reticulocyte fraction of red cells/High light scatter percentage of red cells/High light scatter reticulocyte count/Reticulocyte count/Ulcerative colitis/Inflammatory bowel disease | 30.58 |
| rs13082569 | Body mass index/Arm fat mass right/Qualifications: college or university degree/Impedance of whole body/Leg fat mass right/Leg fat mass left/Arm fat mass left/Weight | 46.87 |
| rs6545977 | Self-reported prostate cancer/Prostate cancer/Body mass index/Prostate cancer/Prostatic neoplasms/Trunk fat-free mass/Trunk predicted mass/Whole body water mass/No blood clot, bronchitis, emphysema, rhinitis, eczema or allergy diagnosed by doctor | 30.07 |
| rs1422192 | Body mass index/Whole body fat mass/Arm fat mass left/Arm fat mass right/Leg fat mass right/Trunk fat mass/Arm fat percentage left/Leg fat mass left/Arm fat percentage right/Weight | 47.92 |
| rs6722794 | Frequency of unenthusiasm or disinterest in last 2 weeks | 32.08 |
| rs4729379 | Nervous feelings/Worrier or anxious feelings | 33.20 |
| rs1031831 | Impedance of arm left/Loneliness, isolation/Primary sclerosing cholangitis and ulcerative colitis/Impedance of arm right/Frequency of stair climbing in last 4 weeks/Smoking status: current/Current tobacco smoking/Types of physical activity in last 4 weeks: walking for pleasure/Age at first live birth/Age first birth | 35.66 |
| rs6862251 | No data available in table | 37.89 |
| rs699534 | Daytime dozing or sleeping | 40.52 |
| rs7998050 | Qualifications: college or university degree/Qualifications: none/Years of educational attainment/Qualifications: A levels or as levels or equivalent/Years of educational attainment in females/Mood swings/Job involves heavy manual or physical work/Time spent watching television/Job involves mainly walking or standing/Overall health rating | 31.84 |

**Supplementary Table 1D.** SNPs selected in Mendelian randomization analyses of the association between loneliness and neuroticism.

| **SNPs** | **Traits** | **F statistics** |
| --- | --- | --- |
| rs6430286 | Neuroticism score\Sensitivity or hurt feelings\Dislocation, sprain and strain of joints and ligaments at ankle and foot level | 32.14 |
| rs74338595 | Loneliness, isolation\Qualifications: college or university degree\Fed-up feelings\Mood swings\Time spent using computer | 34.26 |
| rs4465966 | Loneliness, isolation\Hand grip strength left | 32.13 |
| rs2069117 | Morning or evening person\Loneliness, isolation\Getting up in morning\Schizophrenia\Time spent watching television | 37.54 |
| rs10456089 | Fed-up feelings\Neuroticism score\Loneliness, isolation\Miserableness\Neuroticism | 35.50 |
| rs7770860 | Sitting height\Height\Heel bone mineral density\Forced vital capacity\Comparative height size at age 10\Heel bone mineral density right\Forced vital capacity, best measure\Loneliness, isolation\Heel bone mineral density left | 32.12 |
| rs773020 | Loneliness, isolation | 34.07 |
| rs13291079 | Comparative body size at age 10\Loneliness, isolation\Overall health rating\Years of educational attainment in females\Frequency of depressed mood in last 2 weeks\Heel bone mineral density\Sleeplessness or insomnia\Neuroticism score\Qualifications: A levels or as levels or equivalent\Illness, injury, bereavement, stress in last 2 years: financial difficulties\Fed-up feelings | 41.98 |
| rs613872 | Fuchs corneal dystrophy\Fuchs endothelial dystrophy\Creatinine in urine\Impedance of whole body\Impedance of arm left\Usual walking pace\Impedance of arm right\Overall health rating\Hand grip strength right\Mood swings\Fed-up feelings\Impedance of leg left\Qualifications: college or university degree\Hand grip strength left\Impedance of leg right\Loneliness, isolation\Age at first live birth\Time spent using computer\Body mass index\Types of physical activity in last 4 weeks: walking for pleasure\Sodium in urine\Forced expiratory volume in 1-second\Potassium in urine\Miserableness | 56.45 |
| rs1022688 | Height\Sitting height\Comparative height size at age 10\Forced vital capacity\Forced vital capacity, best measure\Trunk fat-free mass\Trunk predicted mass\Hand grip strength right\Time spent driving\Forced expiratory volume in 1-second\Whole body water mass\Whole body fat-free mass\Loneliness, isolation\Forced expiratory volume in 1-second, best measure\Arm predicted mass right\Hand grip strength left\Arm fat percentage left\Arm fat percentage right\Leg fat percentage left | 30.72 |
| rs2149351 | Neuroticism\Neuroticism multi trait analysis\Neuroticism score\Fed-up feelings\Neuroticism\Neuroticism\Neuroticism | 30.25 |

**Supplementary Table 1E.** SNPs selected in Mendelian randomization analyses of the association between loneliness (MTAG) and neuroticism.

| **SNPs** | **Traits** | **F statistics** |
| --- | --- | --- |
| rs6430286 | Neuroticism score/Sensitivity or hurt feelings/Dislocation, sprain and strain of joints and ligaments at ankle and foot level | 31.38 |
| rs74338595 | Loneliness, isolation/Qualifications: college or university degree/Fed-up feelings/Mood swings/Time spent using computer | 34.11 |
| rs4465966 | Loneliness, isolation/Hand grip strength left | 35.05 |
| rs30266 | Nap during day/Seen doctor for nerves, anxiety, tension or depression/Leg fat percentage right/Comparative body size at age 10/Long-standing illness, disability or infirmity/Leg fat percentage left/Sleeplessness or insomnia/Ever depressed for a whole week/Leg fat mass right/Overall health rating | 31.56 |
| rs2069117 | Morning or evening person/Loneliness, isolation/Getting up in morning/Schizophrenia/Time spent watching television | 45.06 |
| rs10456089 | Fed-up feelings/Neuroticism score/Loneliness, isolation/Miserableness/Neuroticism | 32.97 |
| rs773020 | Loneliness, isolation | 36.43 |
| rs10992800 | Comparative body size at age 10/Loneliness, isolation/Overall health rating/Frequency of depressed mood in last 2 weeks/Qualifications: A levels or as levels or equivalent/Years of educational attainment in females/Neuroticism score/Qualifications: none/Types of physical activity in last 4 weeks: none of the above/Sleeplessness or insomnia | 54.91 |
| rs11605348 | Height/Arm fat percentage left/Arm fat percentage right/Body fat percentage/Trunk fat percentage/Sitting height/Leg fat percentage left/Body mass index/Leg fat percentage right/Arm fat mass left | 32.14 |
| rs1966836 | Average weekly red wine intake/Alcohol usually taken with meals | 33.30 |
| rs613872 | Fuchs corneal dystrophy/Fuchs endothelial dystrophy/Creatinine in urine/Impedance of whole body/Impedance of arm left/Usual walking pace/Impedance of arm right/Overall health rating/Hand grip strength right/Mood swings | 70.90 |
| rs1022688 | Height/Sitting height/Comparative height size at age 10/Forced vital capacity/Forced vital capacity, best measure /Trunk fat-free mass/Trunk predicted mass/Hand grip strength right/Time spent driving/Forced expiratory volume in 1-second | 35.32 |
| rs495146 | Schizophrenia | 30.08 |
| rs7770860 | Sitting height\Height\Heel bone mineral density\Forced vital capacity\Comparative height size at age 10\Heel bonemineral density right\Forced vital capacity, best measure\Loneliness, isolation\Heel bone mineral density left | 37.11 |
